# Supplementary material for: Running Footwear and Impact Peak Differences in Recreational Runners
Source: MDPI journal article supplement (doi:10.3390/biology11060818), 2022-05-26
Supplement: s1 [file s1]

# Supplementary File S1: RECREATIONAL RUNNERS BEHAVIOR QUESTIONNAIRE

**What kind of shoes do you use for running? (write the brand, type. e.g: Nike Vomero 16)**

Answer\_\_\_\_\_

**The shoes are the same number size of your feet?**

- Yes
- No, I buy them half point larger
- No, I buy them always 1 point larger
- No, I buy them always 2 points larger

**Do you use only this pair of shoes to run?**

- Yes
- No, I switch them with a different pair when these hurts
- No, I switch them but only with the same model of shoes
- I do not pay attention to the shoes that I use to run

**How often do you change your running shoes?**

- Every 600-800 km
- Every 800-1000 km
- When my feet start hurt
- When the sole of the shoes starts to get ruined

**Do you use any particular sole? (es: Noene, shock absorbing, ecc)**

- No
- Yes (if yes, specify the type)
- Other

**Do your feet hurt when you sto running?**

- Yes
- No
- Sometimes, but non every time

**How much kilometers do you run per week?**

Answer\_\_\_\_\_

**How many times do you run on average per week?**

- 1
- 2
- 3
- 4
- 5
- 6

**How many times in the last year did you have to stop for at least two weeks due to an injury?**

- 0
- 1
- 2
- 3
- 4
- 5

**Choose which region of interest had traumas in the last year?**

- Hip
- Groin
- Posterior thigh
- Anterior thigh
- Knee
- Shin
- Calf
- Foot
- Achilles tendon
- None of these

**If you had a trauma, it was:**

- Mild, I just had to rest and it went away alone
- Moderate, I needed prolonged rest and ice
- Severe, I had to take drugs or undergo physiotherapy

**Do you practice any other sport aside from running?**

- No
- Yes (if yes, specify which)
- Other
